# Supplementary material for: Clinical, laboratory and health-related quality of life correlates of Systemic Lupus Erythematosus Responder Index response: a post hoc analysis of the phase 3 belimumab trials
Source: HighWire-hosted journal article supplement (doi:10.1136/lupus-2014-000031), 2014-06-01

**Figure S1. Spydergram of SF-36 domain scores at baseline and Week 52.**

#P<0.001. A/G, age-/gender-matched; BP, bodily pain; GH, general health; MH, mental health; PF, physical functioning; RE, role-emotional; RP, role-physical; SF, social functioning; VT, vitality.

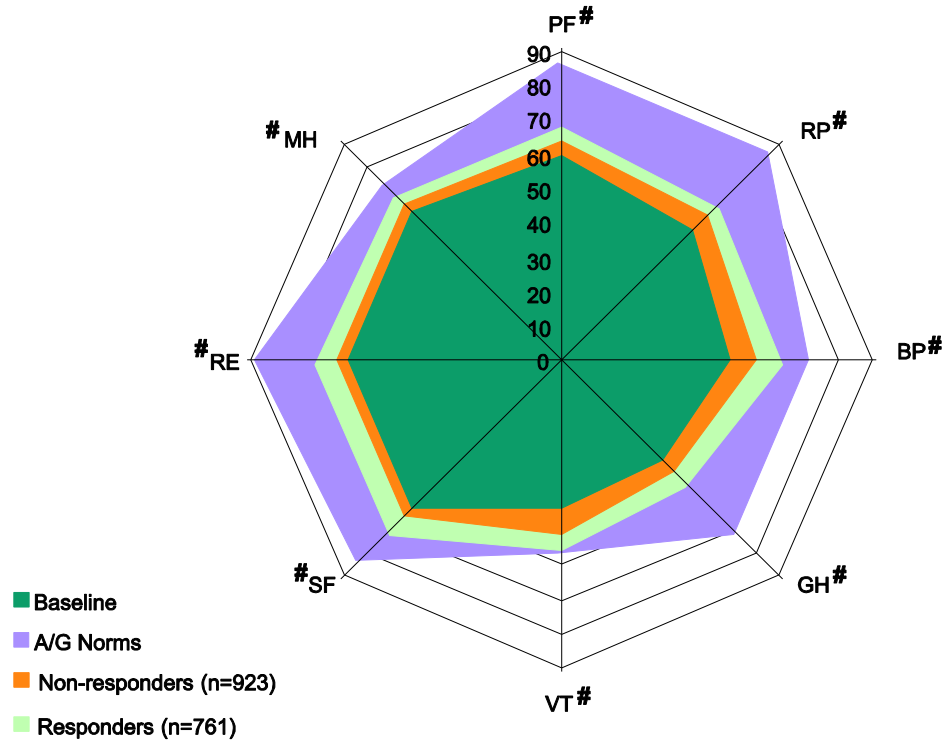

Supplement: lupus-2014-000031supp.pdf [file lupus-2014-000031supp.pdf]
